# Supplementary material for: Postprandial Effects of Breakfast Glycemic Index on Vascular Function among Young Healthy Adults: A Crossover Clinical Trial
Source: MDPI journal article supplement (doi:10.3390/nu9070712), 2017-07-07
Supplement: s1 [file s1]

**Table S3:** Effects of type of breakfast on postprandial responses

| Source                 |         |                    | Type III<br>Sum of<br>Squares | Mean<br>Square | F   | Sig. | Partial Eta<br>Squared | Observed<br>Power |
|------------------------|---------|--------------------|-------------------------------|----------------|-----|------|------------------------|-------------------|
| <b>AIx * breakfast</b> | Global  | Sphericity Assumed | 1411                          | 235            | 3.4 | .003 | .055                   | 0.94              |
|                        |         | Greenhouse-Geisser | 1411                          | 252            | 3.4 | .004 | .055                   | 0.93              |
|                        | Males   | Sphericity Assumed | 1752                          | 292            | 3.2 | .005 | .101                   | 0.92              |
|                        |         | Greenhouse-Geisser | 1752                          | 331            | 3.2 | .008 | .101                   | 0.89              |
|                        | Females | Sphericity Assumed | 221                           | 37             | 0.8 | .601 | .026                   | 0.30              |
|                        |         | Greenhouse-Geisser | 221                           | 40             | 0.8 | .592 | .026                   | 0.29              |
| <b>AP * breakfast</b>  | Global  | Sphericity Assumed | 188                           | 31             | 3.2 | .005 | .051                   | 0.92              |
|                        |         | Greenhouse-Geisser | 188                           | 35             | 3.2 | .007 | .051                   | 0.90              |
|                        | Males   | Sphericity Assumed | 208                           | 35             | 2.9 | .010 | .092                   | 0.89              |
|                        |         | Greenhouse-Geisser | 208                           | 41             | 2.9 | .015 | .092                   | 0.84              |
|                        | Females | Sphericity Assumed | 36                            | 6              | 0.7 | .622 | .025                   | 0.29              |
|                        |         | Greenhouse-Geisser | 36                            | 7              | 0.7 | .606 | .025                   | 0.27              |
| <b>HR * breakfast</b>  | Global  | Sphericity Assumed | 595                           | 99             | 7.2 | .000 | .110                   | 1.00              |
|                        |         | Greenhouse-Geisser | 595                           | 106            | 7.2 | .000 | .110                   | 1.00              |
|                        | Males   | Sphericity Assumed | 230                           | 38             | 2.7 | .016 | .086                   | 0.86              |
|                        |         | Greenhouse-Geisser | 230                           | 48             | 2.7 | .026 | .086                   | 0.79              |
|                        | Females | Sphericity Assumed | 426                           | 71             | 5.3 | .000 | .156                   | 1.00              |
|                        |         | Greenhouse-Geisser | 426                           | 72             | 5.3 | .000 | .156                   | 0.99              |
| <b>PPP * breakfast</b> | Global  | Sphericity Assumed | 611                           | 102            | 2.6 | .016 | .043                   | 0.86              |
|                        |         | Greenhouse-Geisser | 611                           | 116            | 2.6 | .021 | .043                   | 0.82              |
|                        | Males   | Sphericity Assumed | 397                           | 66             | 1.5 | .174 | .051                   | 0.58              |
|                        |         | Greenhouse-Geisser | 397                           | 82             | 1.5 | .189 | .051                   | 0.51              |
|                        | Females | Sphericity Assumed | 302                           | 50             | 1.4 | .204 | .048                   | 0.55              |
|                        |         | Greenhouse-Geisser | 302                           | 54             | 1.4 | .209 | .048                   | 0.53              |

|                            |         |                    |      |      |      |      |      |      |
|----------------------------|---------|--------------------|------|------|------|------|------|------|
| <b>CPP * breakfast</b>     | Global  | Sphericity Assumed | 332  | 55   | 2.0  | .070 | .033 | 0.72 |
|                            |         | Greenhouse-Geisser | 332  | 63   | 2.0  | .079 | .033 | 0.68 |
|                            | Males   | Sphericity Assumed | 181  | 30   | 1.2  | .289 | .042 | 0.48 |
|                            |         | Greenhouse-Geisser | 181  | 37   | 1.2  | .295 | .042 | 0.42 |
|                            | Females | Sphericity Assumed | 206  | 34   | 1.0  | .396 | .035 | 0.41 |
|                            |         | Greenhouse-Geisser | 206  | 49   | 1.0  | .387 | .035 | 0.33 |
| <b>Glucose * breakfast</b> | Global  | Sphericity Assumed | 1727 | 432  | 3.5  | .009 | .056 | 0.86 |
|                            |         | Greenhouse-Geisser | 1727 | 506  | 3.5  | .013 | .056 | 0.81 |
|                            | Males   | Sphericity Assumed | 330  | 82   | 1.0  | .433 | .033 | 0.30 |
|                            |         | Greenhouse-Geisser | 330  | 110  | 1.0  | .416 | .033 | 0.25 |
|                            | Females | Sphericity Assumed | 2024 | 506  | 3.1  | .018 | .099 | 0.80 |
|                            |         | Greenhouse-Geisser | 2024 | 599  | 3.1  | .025 | .099 | 0.75 |
| <b>Insulin * breakfast</b> | Global  | Sphericity Assumed | 9554 | 2389 | 31.5 | .000 | .350 | 1.00 |
|                            |         | Greenhouse-Geisser | 9554 | 3750 | 31.5 | .000 | .350 | 1.00 |
|                            | Males   | Sphericity Assumed | 4538 | 1135 | 10.9 | .000 | .277 | 1.00 |
|                            |         | Greenhouse-Geisser | 4538 | 1880 | 10.9 | .000 | .277 | 1.00 |
|                            | Females | Sphericity Assumed | 5072 | 1268 | 24.9 | .000 | .466 | 1.00 |
|                            |         | Greenhouse-Geisser | 5072 | 1846 | 24.9 | .000 | .466 | 1.00 |

Repeated measures ANOVA using the general lineal model (GLM) has been performed.

AIx: augmentation index; AP: augmentation pressure; HR: heart rate; PPP: peripheral pulse pressure; CPP: central pulse pressure.
