# Supplementary material for: Postprandial Effects of Breakfast Glycemic Index on Vascular Function among Young Healthy Adults: A Crossover Clinical Trial
Source: MDPI journal article supplement (doi:10.3390/nu9070712), 2017-07-07
Supplement: s1 [file s1]

## Supplemental figures

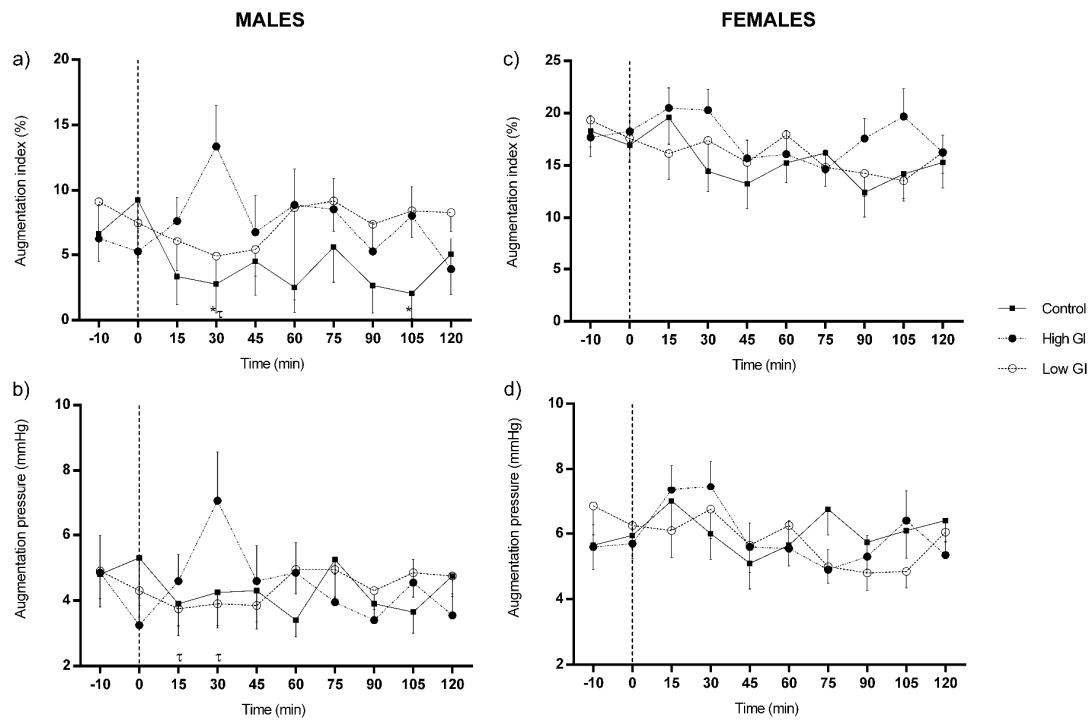

**Figure S2.** Changes in central hemodynamics in response to each type of breakfast (BF) by sex. All data were statistically analyzed with the Student's t-test for paired data. \* denotes significant changes ( $p<0.05$ ) in response to control conditions;  $\tau$  denotes significant changes ( $p<0.05$ ) in response to high GI BF; and  $\beta$  denotes significant changes ( $p<0.05$ ) in response to low GI BF.

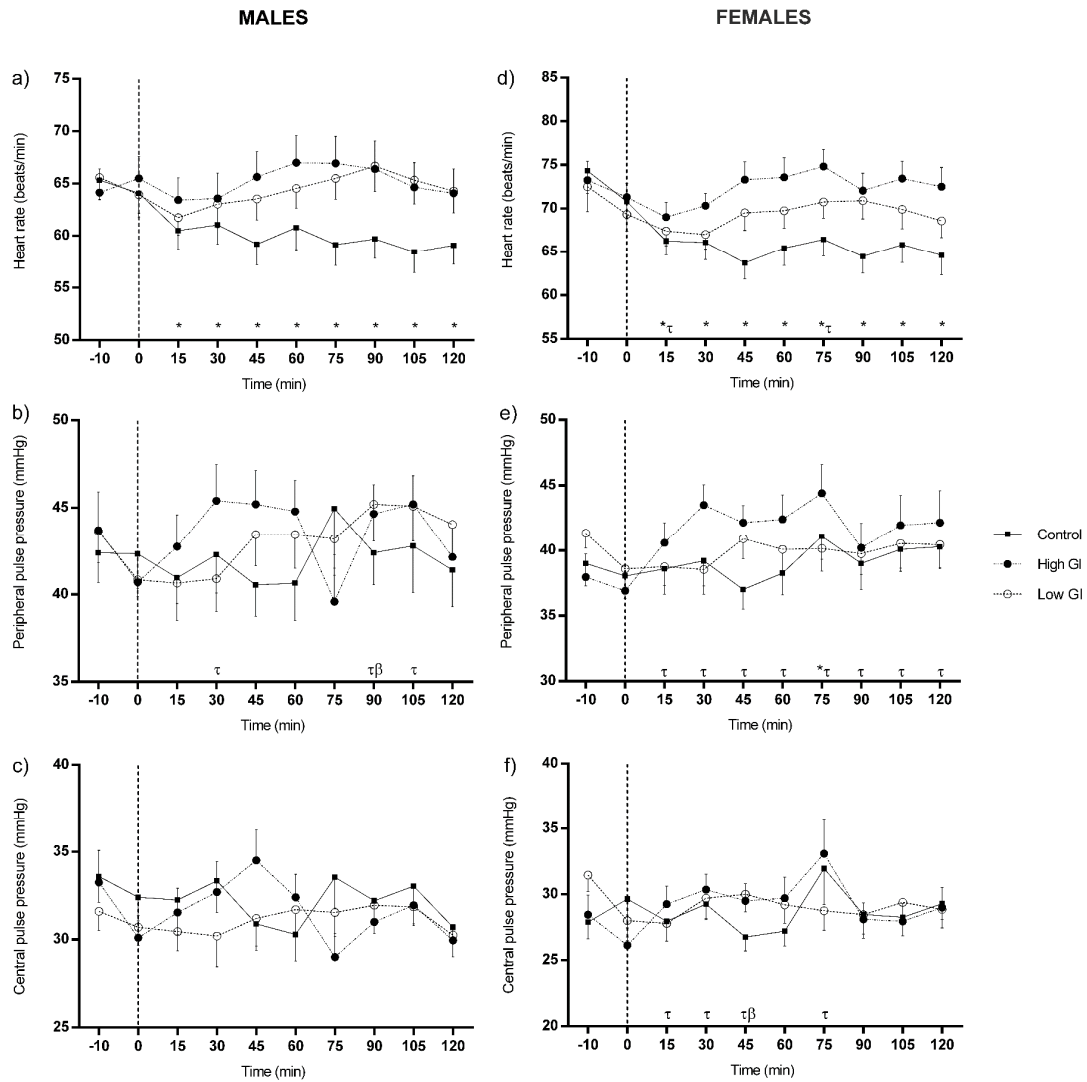

**Figure S3.** Changes in heart rate and pulse pressures in response to each type of breakfast (BF) by sex. All data were statistically analyzed with the Student's t-test for paired data. \* denotes significant changes ( $p < 0.05$ ) in response to control conditions;  $\tau$  denotes significant changes ( $p < 0.05$ ) in response to high GI BF; and  $\beta$  denotes significant changes ( $p < 0.05$ ) in response to low GI BF.

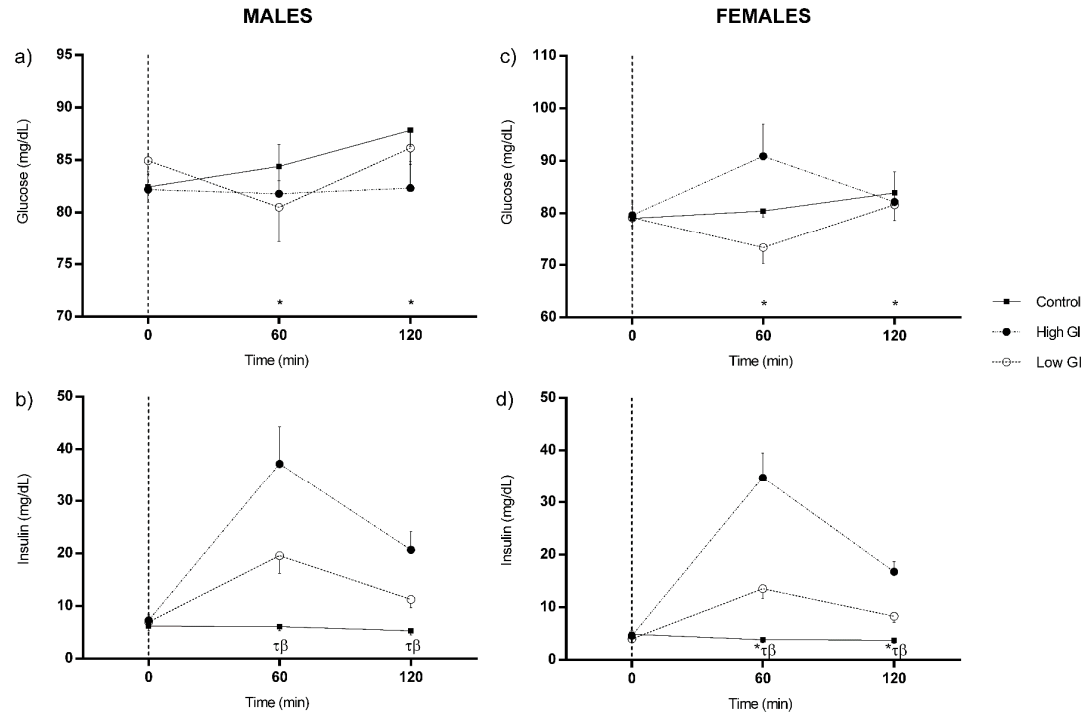

**Figure S4.** Changes in glucose and insulin in response to each type of breakfast (BF) by sex. All data were statistically analyzed with the Student's *t*-test for paired data. \* denotes significant changes ( $p < 0.05$ ) in response to control conditions;  $\tau$  denotes significant changes ( $p < 0.05$ ) in response to high GI BF; and  $\beta$  denotes significant changes ( $p < 0.05$ ) in response to low GI BF.
