# Supplementary material for: Postprandial Effects of Breakfast Glycemic Index on Vascular Function among Young Healthy Adults: A Crossover Clinical Trial
Source: MDPI journal article supplement (doi:10.3390/nu9070712), 2017-07-07
Supplement: s1 [file s1]

**Table S2:** Comparisons between postprandial responses to each type of breakfast in females

| AUGMENTATION<br>INDEX (AIx), %              | 0 min- AIx |       |       | 30 min- AIx |       |       | 60 min- AIx        |       |       | 120 min- AIx       |       |       |
|---------------------------------------------|------------|-------|-------|-------------|-------|-------|--------------------|-------|-------|--------------------|-------|-------|
|                                             | Mean       | SD    | p     | Mean        | SD    | p     | Mean               | SD    | p     | Mean               | SD    | p     |
| Control conditions                          | 16.95      | 7.37  | 0.882 | 14.45       | 8.61  | 0.187 | 15.25              | 8.48  | 0.643 | 15.30              | 9.19  | 0.921 |
| HGI breakfast                               | 18.25      | 6.79  |       | 20.30       | 8.94  |       | 16.10              | 10.03 |       | 16.25              | 7.53  |       |
| LGI breakfast                               | 17.60      | 10.08 |       | 17.40       | 11.98 |       | 17.95              | 9.17  |       | 16.25              | 8.87  |       |
| AUGMENTATION<br>PRESSURE (AP),<br>mmHg      | 0 min-AP   |       |       | 30 min-AP   |       |       | 60 min-AP          |       |       | 120 min-AP         |       |       |
|                                             | Mean       | SD    | p     | Mean        | SD    | p     | Mean               | SD    | p     | Mean               | SD    | p     |
| Control conditions                          | 5.95       | 3.25  | 0.894 | 6.00        | 3.52  | 0.466 | 5.65               | 2.89  | 0.769 | 6.40               | 2.95  | 0.437 |
| HGI breakfast                               | 5.70       | 3.06  |       | 7.45        | 3.49  |       | 5.55               | 3.79  |       | 5.35               | 1.87  |       |
| LGI breakfast                               | 6.25       | 4.55  |       | 6.75        | 4.03  |       | 6.25               | 3.14  |       | 6.05               | 2.87  |       |
| HEART RATE (HR),<br>bpm                     | 0 min-HR   |       |       | 30 min-HR   |       |       | 60 min-HR          |       |       | 120 min-HR         |       |       |
|                                             | Mean       | SD    | p     | Mean        | SD    | p     | Mean               | SD    | p     | Mean               | SD    | p     |
| Control conditions                          | 70.80      | 8.87  | 0.744 | 66.10       | 8.96  | 0.191 | 65.45              | 8.98  | 0.028 | 64.60              | 10.06 | 0.040 |
| HGI breakfast                               | 71.30      | 7.25  |       | 70.35       | 6.28  |       | 73.60 <sup>¥</sup> | 9.91  |       | 72.50 <sup>¥</sup> | 9.89  |       |
| LGI breakfast                               | 69.35      | 8.73  |       | 67.00       | 7.56  |       | 69.75              | 9.10  |       | 68.60              | 8.65  |       |
| PERIPHERAL<br>PULSE PRESSURE<br>(PPP), mmHg | 0 min-PPP  |       |       | 30 min-PPP  |       |       | 60 min-PPP         |       |       | 120 min-PPP        |       |       |
|                                             | Mean       | SD    | p     | Mean        | SD    | p     | Mean               | SD    | p     | Mean               | SD    | p     |
| Control conditions                          | 38.05      | 7.80  | 0.739 | 39.20       | 8.58  | 0.117 | 38.25              | 7.36  | 0.281 | 40.30              | 7.66  | 0.770 |
| HGI breakfast                               | 36.90      | 6.46  |       | 43.50       | 6.96  |       | 42.40              | 8.44  |       | 42.15              | 10.92 |       |
| LGI breakfast                               | 38.60      | 6.79  |       | 38.55       | 8.53  |       | 40.10              | 8.63  |       | 40.45              | 7.98  |       |

| CENTRAL PULSE<br>PRESSURE (CPP),<br>mmHg | 0 min-CPP     |       |       | 30 min-CPP |      |       | 60 min-CPP          |       |        | 120 min-CPP         |       |        |
|------------------------------------------|---------------|-------|-------|------------|------|-------|---------------------|-------|--------|---------------------|-------|--------|
|                                          | Mean          | SD    | p     | Mean       | SD   | p     | Mean                | SD    | p      | Mean                | SD    | p      |
| Control conditions                       | 29.65         | 12.95 | 0.480 | 29.25      | 4.84 | 0.841 | 27.20               | 4.98  | 0.412  | 29.30               | 5.48  | 0.973  |
| HGI breakfast                            | 26.15         | 5.86  |       | 30.35      | 5.34 |       | 29.70               | 7.20  |        | 29.00               | 6.90  |        |
| LGI breakfast                            | 28.00         | 6.75  |       | 29.70      | 7.34 |       | 29.20               | 6.33  |        | 28.85               | 6.23  |        |
| GLUCOSE, mg/dL                           | 0 min-Glucose |       |       |            |      |       | 60 min-Glucose      |       |        | 120 min-Glucose     |       |        |
|                                          | Mean          | SD    | p     |            |      |       | Mean                | SD    | p      | Mean                | SD    | p      |
| Control conditions                       | 79.00         | 6.10  | 0.964 |            |      |       | 80.45               | 5.39  | 0.011  | 83.90               | 6.26  | 0.901  |
| HGI breakfast                            | 79.65         | 9.76  |       |            |      |       | 90.90 <sup>#</sup>  | 27.19 |        | 82.20               | 25.55 |        |
| LGI breakfast                            | 79.15         | 7.69  |       |            |      |       | 73.35               | 13.88 |        | 81.65               | 9.93  |        |
| INSULIN, mg/dL                           | 0 min-Insulin |       |       |            |      |       | 60 min-Insulin      |       |        | 120 min-Insulin     |       |        |
|                                          | Mean          | SD    | p     |            |      |       | Mean                | SD    | p      | Mean                | SD    | p      |
| Control conditions                       | 4.89          | 3.09  | 0.727 |            |      |       | 3.88                | 2.57  | <0.001 | 3.76                | 2.59  | <0.001 |
| HGI breakfast                            | 4.62          | 4.24  |       |            |      |       | 34.76 <sup>‡#</sup> | 21.14 |        | 16.76 <sup>‡#</sup> | 8.76  |        |
| LGI breakfast                            | 4.03          | 2.95  |       |            |      |       | 13.58               | 8.44  |        | 8.32                | 5.00  |        |

ANOVA test has been used. Post-hoc contrasts were performed by Bonferroni test.

<sup>‡</sup> Significantly different ( $p < 0.05$ ) from control conditions.

<sup>#</sup> Significant difference ( $p < 0.05$ ) between HGI and LGI breakfasts.

HGI: High glycemic index; LGI: Low glycemic index.
