# Supplementary material for: Postprandial Effects of Breakfast Glycemic Index on Vascular Function among Young Healthy Adults: A Crossover Clinical Trial
Source: MDPI journal article supplement (doi:10.3390/nu9070712), 2017-07-07
Supplement: s1 [file s1]

**Table S1:** Comparisons between postprandial responses to each type of breakfast in males

| AUGMENTATION<br>INDEX (AIx), %              | 0 min- AIx |       |       | 30 min- AIx        |       |       | 60 min- AIx |       |       | 120 min- AIx |       |       |
|---------------------------------------------|------------|-------|-------|--------------------|-------|-------|-------------|-------|-------|--------------|-------|-------|
|                                             | Mean       | SD    | p     | Mean               | SD    | p     | Mean        | SD    | p     | Mean         | SD    | p     |
| Control conditions                          | 9.25       | 12.17 | 0.549 | 2.75               | 9.82  | 0.011 | 2.50        | 8.56  | 0.063 | 5.05         | 13.93 | 0.416 |
| HGI breakfast                               | 5.25       | 8.27  |       | 13.35 <sup>‡</sup> | 14.14 |       | 8.90        | 12.18 |       | 3.90         | 10.71 |       |
| LGI breakfast                               | 7.50       | 13.47 |       | 4.90               | 9.54  |       | 8.70        | 7.17  |       | 8.30         | 6.46  |       |
| AUGMENTATION<br>PRESSURE (AP),<br>mmHg      | 0 min-AP   |       |       | 30 min-AP          |       |       | 60 min-AP   |       |       | 120 min-AP   |       |       |
|                                             | Mean       | SD    | p     | Mean               | SD    | p     | Mean        | SD    | p     | Mean         | SD    | p     |
| Control conditions                          | 5.30       | 5.54  | 0.299 | 4.25               | 4.53  | 0.107 | 3.40        | 2.28  | 0.265 | 4.75         | 5.15  | 0.514 |
| HGI breakfast                               | 3.25       | 2.69  |       | 7.05               | 6.78  |       | 4.85        | 4.11  |       | 3.55         | 2.91  |       |
| LGI breakfast                               | 4.30       | 3.63  |       | 3.90               | 3.28  |       | 4.95        | 3.33  |       | 4.75         | 2.79  |       |
| HEART RATE (HR),<br>bpm                     | 0 min-HR   |       |       | 30 min-HR          |       |       | 60 min-HR   |       |       | 120 min-HR   |       |       |
|                                             | Mean       | SD    | p     | Mean               | SD    | p     | Mean        | SD    | p     | Mean         | SD    | p     |
| Control conditions                          | 64.10      | 8.63  | 0.843 | 61.05              | 8.38  | 0.689 | 60.80       | 9.66  | 0.151 | 59.10        | 8.25  | 0.147 |
| HGI breakfast                               | 65.50      | 9.51  |       | 63.60              | 10.79 |       | 67.00       | 11.65 |       | 64.10        | 10.36 |       |
| LGI breakfast                               | 63.95      | 9.54  |       | 63.05              | 10.06 |       | 64.55       | 8.41  |       | 64.30        | 9.37  |       |
| PERIPHERAL<br>PULSE PRESSURE<br>(PPP), mmHg | 0 min-PPP  |       |       | 30 min-PPP         |       |       | 60 min-PPP  |       |       | 120 min-PPP  |       |       |
|                                             | Mean       | SD    | p     | Mean               | SD    | p     | Mean        | SD    | p     | Mean         | SD    | p     |
| Control conditions                          | 42.35      | 8.96  | 0.720 | 42.30              | 9.86  | 0.294 | 40.65       | 9.55  | 0.316 | 41.40        | 9.44  | 0.589 |
| HGI breakfast                               | 40.70      | 7.18  |       | 45.40              | 9.32  |       | 44.80       | 7.95  |       | 42.15        | 5.72  |       |
| LGI breakfast                               | 40.85      | 4.38  |       | 40.90              | 8.37  |       | 43.45       | 8.63  |       | 44.05        | 9.36  |       |

| CENTRAL PULSE<br>PRESSURE (CPP),<br>mmHg | 0 min-CPP     |      |       | 30 min-CPP |      |       | 60 min-CPP         |       |        | 120 min-CPP        |       |        |
|------------------------------------------|---------------|------|-------|------------|------|-------|--------------------|-------|--------|--------------------|-------|--------|
|                                          | Mean          | SD   | p     | Mean       | SD   | p     | Mean               | SD    | p      | Mean               | SD    | p      |
| Control conditions                       | 32.40         | 5.98 | 0.390 | 33.35      | 8.11 | 0.418 | 30.30              | 6.88  | 0.573  | 30.70              | 7.52  | 0.916  |
| HGI breakfast                            | 30.10         | 5.66 |       | 32.70      | 7.78 |       | 32.40              | 5.82  |        | 29.95              | 3.27  |        |
| LGI breakfast                            | 30.70         | 4.62 |       | 30.20      | 7.83 |       | 31.70              | 6.41  |        | 30.25              | 5.51  |        |
| GLUCOSE, mg/dL                           | 0 min-Glucose |      |       |            |      |       | 60 min-Glucose     |       |        | 120 min-Glucose    |       |        |
|                                          | Mean          | SD   | p     |            |      |       | Mean               | SD    | p      | Mean               | SD    | p      |
| Control conditions                       | 82.45         | 6.67 | 0.366 |            |      |       | 84.40              | 6.03  | 0.715  | 87.85              | 6.89  | 0.125  |
| HGI breakfast                            | 82.20         | 7.53 |       |            |      |       | 81.80              | 21.03 |        | 82.35              | 11.17 |        |
| LGI breakfast                            | 84.95         | 5.87 |       |            |      |       | 80.50              | 14.88 |        | 86.15              | 6.95  |        |
| INSULIN, mg/dL                           | 0 min-Insulin |      |       |            |      |       | 60 min-Insulin     |       |        | 120 min-Insulin    |       |        |
|                                          | Mean          | SD   | p     |            |      |       | Mean               | SD    | p      | Mean               | SD    | p      |
| Control conditions                       | 6.21          | 4.16 | 0.703 |            |      |       | 6.13               | 3.88  | <0.001 | 5.32               | 3.82  | <0.001 |
| HGI breakfast                            | 7.30          | 4.54 |       |            |      |       | 37.21 <sup>‡</sup> | 31.86 |        | 20.68 <sup>‡</sup> | 15.79 |        |
| LGI breakfast                            | 6.99          | 3.99 |       |            |      |       | 19.62              | 15.31 |        | 11.29              | 7.21  |        |

ANOVA test has been used. Post-hoc contrasts were performed by Bonferroni test.

<sup>‡</sup> Significantly different ( $p < 0.05$ ) from control conditions.

<sup>#</sup> Significant difference ( $p < 0.05$ ) between HGI and LGI breakfasts.

HGI: High glycemic index; LGI: Low glycemic index.
